# Supplementary material
Source: PubMed Central journal article supplement (PMC3457177)
Supplement: JVI.01543-12_zjv999096671so1.pdf [file JVI.01543-12_zjv999096671so1.pdf]

## Supplementary Fig.S1

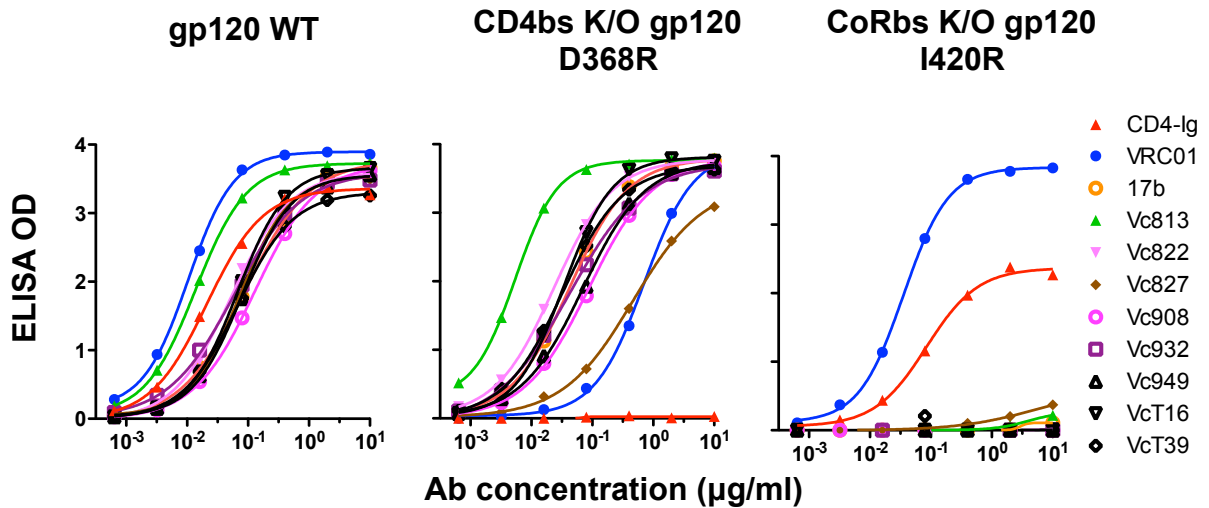

**Supplementary Fig.S1.** Binding specificity of other CoRbs mAbs to gp120. YU2gp120 CD4bs knockout mutant D368R and CoRbs knockout mutant, I420R were used to define binding specificity. Note that these CoRbs mAbs have the same binding pattern as conventional CoRbs mAb such as 17b, of which binding to YU2gp120 is sensitive to gp120 mutations in CoRbs (I420R), but not in CD4bs (D368R). Control ligands include CD4bs ligands, CD4-Ig and VRC01; and CoRbs mAb, 17b.

# Supplementary Fig.S2

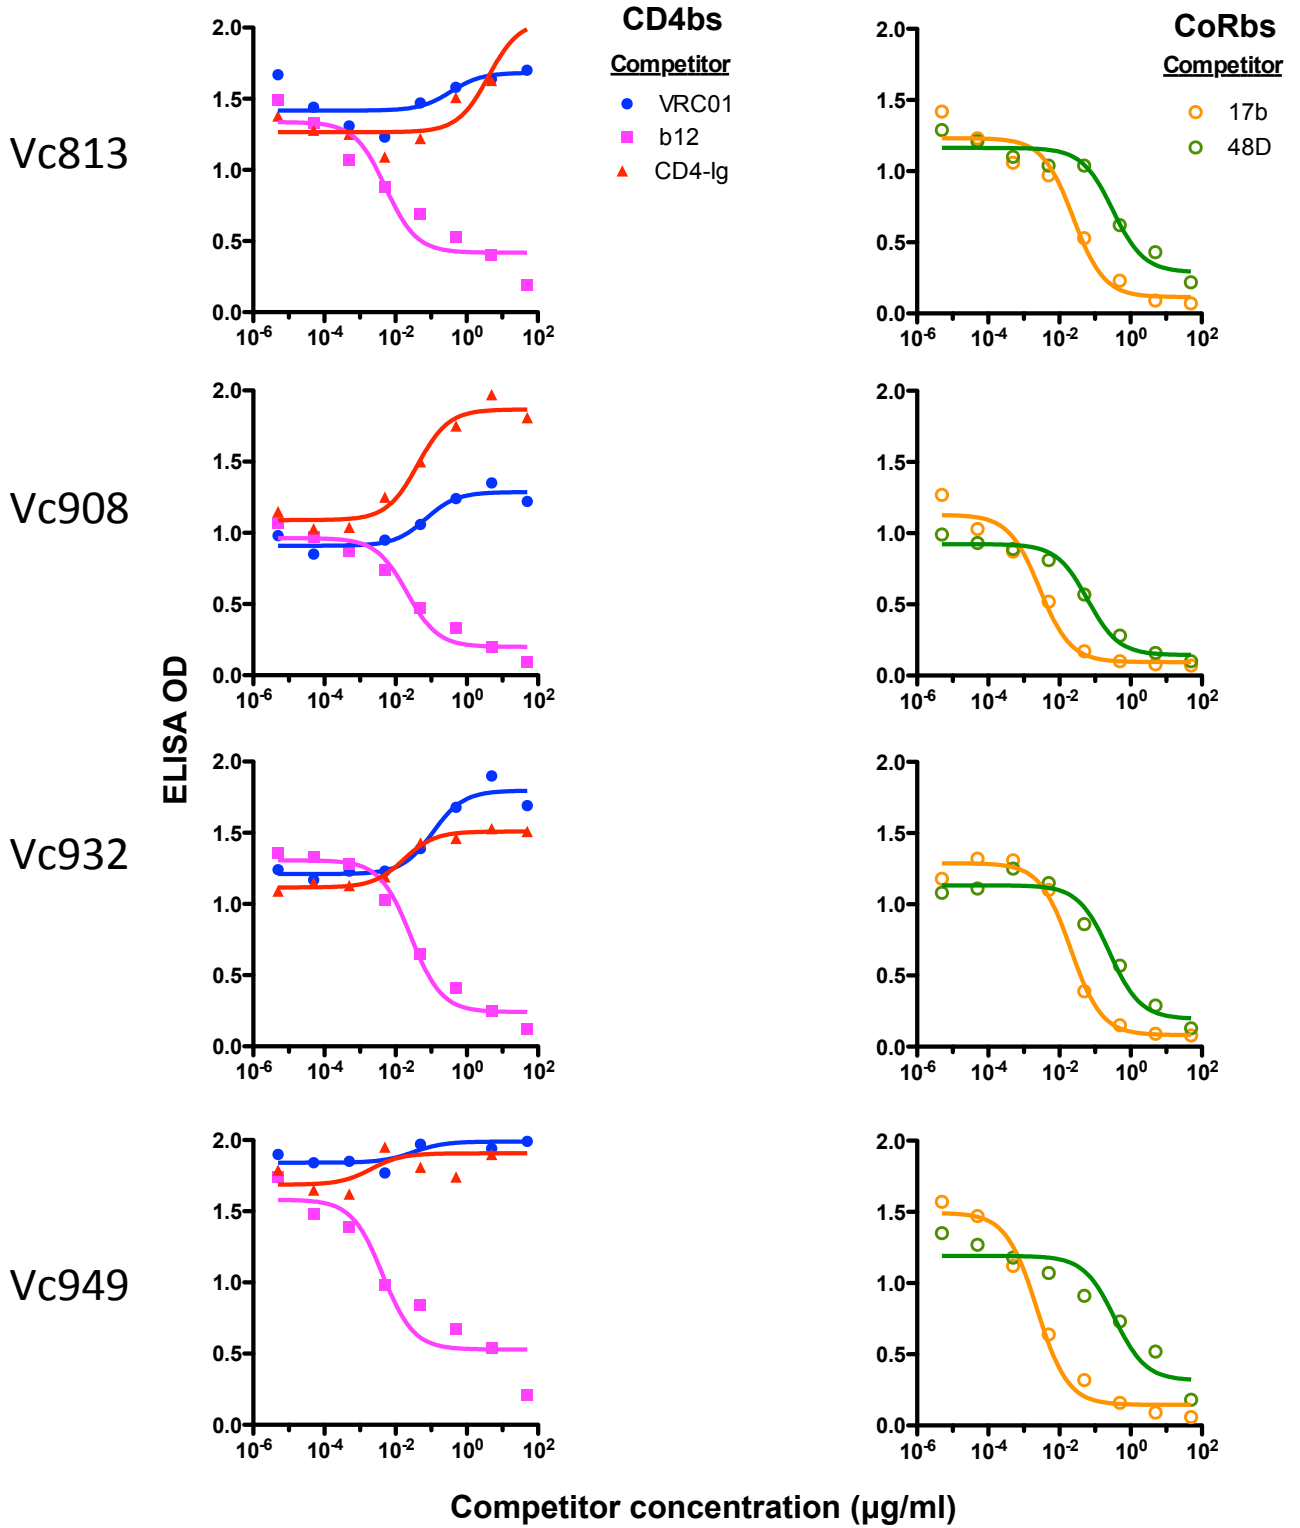

## Supplementary Fig.S2 (continued)

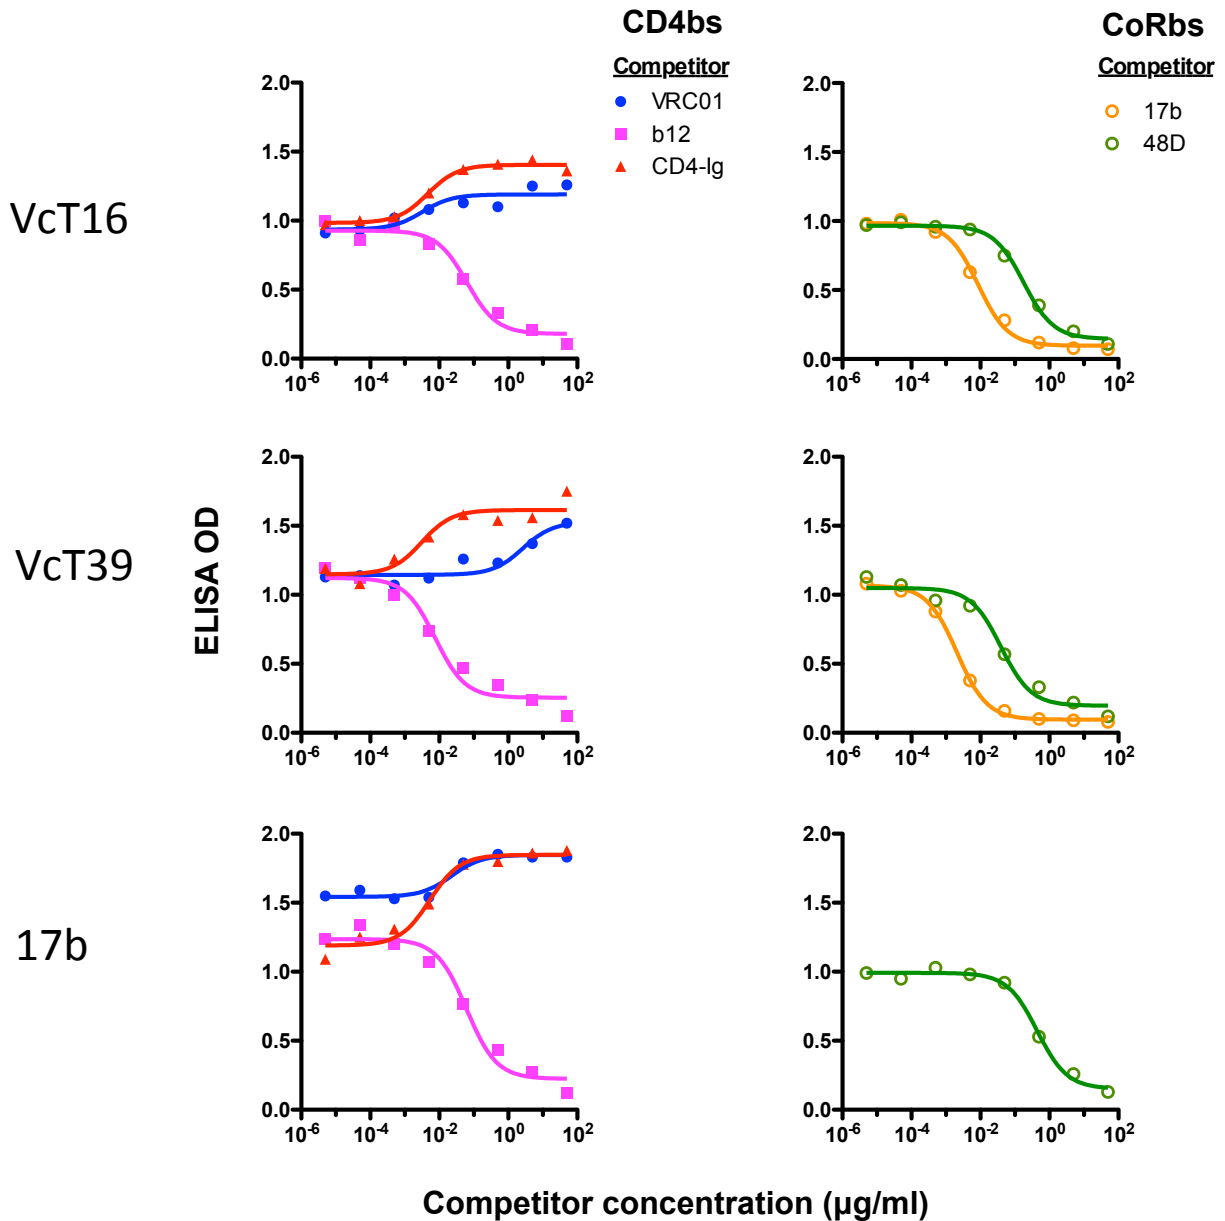

**Supplementary Fig.S2.** Binding specificity of other CoRbs mAbs to gp120 defined by competition ELISA. Biotin-labeled CoRbs mAbs were incubate with Yu2 gp120 in the presence of CD4bs or CoRbs ligands as competitors. Note that these CoRbs mAbs have the same competition pattern as conventional CoRbs mAb such as 17b, of which binding to YU2 gp120 compete with CD4bs mAb b12 and CoRbs mAbs, 17b and 48D. However, their binding to gp120 was enhanced by CD4-Ig and VRC01 as previously observed. CoRbs mAb, 17b was used as control.

## Supplementary Fig.S3.

### Heavy chain

|           |                                 |                 |                   |                 |               |            |
|-----------|---------------------------------|-----------------|-------------------|-----------------|---------------|------------|
|           | 1                               | 10              | 20                | 30              | 40            | 50         |
|           | -----FR1-----                   |                 |                   | -----CDR1-----  | -----FR2----- |            |
| VRC01_HC  | QVQLVQSGGQMKKPGESMRISCRASGYEF   | ID              | TLNWIRLAPGKRPE    | WMGW            |               |            |
| VRC03_HC  | QVQLVQSGAVIKTPGSSVKISCRASGYNFR  | DYSI            | HWVRLIPDKGF       | EWIGW           |               |            |
| VRC06b_HC | QVQLVESGSAMRKPGSSVKISCRASGFNFRE | YSIHWVRLIPGRGLE | WMGW              |                 |               |            |
| VRC06_HC  | EVQLVESGPVMRKPGSSMKISCATSGYNFR  | DFSIHWVRFNRRYGF | EWIGW             |                 |               |            |
|           | 52                              | 60              | 70                | 80              | 82            |            |
|           | A                               |                 |                   | ABC             |               |            |
|           | -----CDR2-----                  |                 |                   | -----FR3-----   |               |            |
| VRC01_HC  | LKPRGGAVNYARPLQGRVT             | MTR             | . . . . .         | DVYSDTAFLELRSLT | VD            | DTAV       |
| VRC03_HC  | IKPLWGA                         | VS              | YARQLQGRVSMTR     | QLSQDPD         | DPDWGVAYMEF   | SGLTSADTAE |
| VRC06b_HC | IKGMWGA                         | VN              | YARQLQGRVSMTR     | QLSQDPD         | DPDWGVAYLDF   | SGLTSGDTGE |
| VRC06_HC  | IKPMWGA                         | VN              | YARQLQGRVSMR      | LFSQDLYY        | PDRGTAYLEF    | SGLTSADTAD |
|           | 90                              | 100             | 101               | 110             |               |            |
|           |                                 | ABCDEF          |                   |                 |               |            |
|           | -----FR3-----                   |                 | -----CDR3-----    | -----FR4-----   |               |            |
| VRC01_HC  | YFCTRGKN                        | .CDYNWDF        | . . EHWGRGTPVIVSS |                 |               |            |
| VRC03_HC  | YFCVRRGS                        | .CDYCGDF        | PWQYWGQGTVVVSS    |                 |               |            |
| VRC06b_HC | YFCVRKGP                        | SCPHCGDF        | HWQHWGQGLV        | VVST            |               |            |
| VRC06_HC  | YFCVRRGS                        | SCPHCGDF        | HFEHWGQGTAVV      | VSA             |               |            |

### Kappa chain

|           |                 |                   |                   |                  |                        |          |          |
|-----------|-----------------|-------------------|-------------------|------------------|------------------------|----------|----------|
|           | 1               | 10                | 20                | 30               | 33                     | 40       | 50       |
|           | -----FR1-----   |                   |                   | -----CDR1-----   | -----FR2-----          |          |          |
| VRC01_KC  | EIVLTQSPGTL     | SLSPGETAIISCR     | TSQYG             | .SLAWYQQRPGQAPRL | VI                     | YSG      |          |
| VRC03_KC  | EIVLTQSPGIL     | SLSPGETATLFC      | KASQGGN           | AMTWYQKRRGQV     | PRLLI                  | YDT      |          |
| VRC06b_KC | EIVLTQSPGTL     | SVSPGERATLFC      | KASQGGN           | SLSWYQKRRGQ      | PPRLLI                 | YDT      |          |
| VRC06_KC  | EIVLTQSPATL     | SLSPGERATLSCR     | ASQGGN            | SLN              | WYQKRRGQTPRLLI         | YDT      |          |
|           |                 | 60                | 70                | 80               | 90                     | 96       | 100      |
|           | -----CDR2-----  |                   | -----FR3-----     |                  | -----CDR3-----FR4----- |          |          |
| VRC01_KC  | STRAAGIPDRFSGSR | WGP               | DYNLTISNLESGDFGVY | YCQQ             | YEF                    | FGQGTKVQ | VDIK     |
| VRC03_KC  | SRRASGVPDRFVGS  | SGTDFFLTINKLDREDF | AVY               | CQ               | QFEF                   | FGLGSE   | . . LEVH |
| VRC06b_KC | SRRASGIPDRFVGS  | SGTDFSLTITKVD     | RDDFALYFCQQ       | FEFF             | FGLGTA                 | . . LEIN |          |
| VRC06_KC  | SRRASDIPEKFVGS  | SGTDFSLTITKVP     | EDFAVY            | CQ               | FEFF                   | FGLGTT   | . . LEIN |

**Supplementary Fig.S3.** Heavy chain and kappa chain amino acid sequence alignment of VRC06 and VRC06b with genetically related mAbs, VRC03 and VRC01, which were previously isolated, following Kabat numbering system. The residues involved in contacting gp120 core of VRC03 and VRC01 defined by previous crystallography study were highlighted in blue, and the according divergent residues of VRC06 and VRC06b were highlighted in magenta. The 7 amino acid insertions, resulted from 21 bp insertion in the heavy chain frame work 3 (FR3) of VRC03, 06, and 06b, were highlighted with yellow box..

**Table S1: Antibody neutralization data against 27 HIV-1 clade A Env-pseudoviruses**

| Virus ID       | Clade       | Origin                 | Neutralization IC <sub>50</sub> * (µg/ml) |            |              | Neutralization IC <sub>80</sub> * (µg/ml) |            |            |
|----------------|-------------|------------------------|-------------------------------------------|------------|--------------|-------------------------------------------|------------|------------|
|                |             |                        | VRC03 <sup>^</sup>                        | VRC06      | VRC06b       | VRC03 <sup>^</sup>                        | VRC06      | VRC06b     |
| 0260.v5.c36    | A           | Tanzania               | 0.872                                     | >50        | 0.804        | 3.6                                       | >50        | 3.1        |
| 0330.v4.c3     | A           | Tanzania               | >50                                       | >50        | >50          | >50                                       | >50        | >50        |
| 0439.v5.c1     | A           | Tanzania               | 0.224                                     | 1.8        | >50          | 0.916                                     | 8.3        | >50        |
| 3365.v2.c20    | A           | Tanzania               | 2.3                                       | >50        | 2.1          | 21.5                                      | >50        | 14.7       |
| 3415.v1.c1     | A           | Tanzania               | 0.033                                     | 0.978      | 0.026        | 0.106                                     | 3.8        | 0.099      |
| 3718.v3.c11    | A           | Tanzania               | >50                                       | >50        | >50          | >50                                       | >50        | >50        |
| 398-F1_F6_20   | A           | Tanzania               | 0.171                                     | >50        | >50          | 1.1                                       | >50        | >50        |
| BB201.B42      | A           | Kenya                  | 24.6                                      | >50        | 2.4          | >50                                       | >50        | 37.1       |
| BB539.2B13     | A           | Kenya                  | 10.4                                      | 1.9        | 1.0          | >50                                       | 10.4       | 10.1       |
| BI369.9A       | A           | Kenya                  | >50                                       | >50        | >50          | >50                                       | >50        | >50        |
| BS208.B1       | A           | Kenya                  | 0.263                                     | 3.8        | 0.099        | 2.3                                       | >50        | 0.432      |
| KER2008.12     | A           | Kenya                  | 0.435                                     | >50        | 28.1         | 1.7                                       | >50        | >50        |
| KER2018.11     | A           | Kenya                  | 0.415                                     | 8.9        | 0.937        | 1.4                                       | 49.9       | 7.4        |
| KNH1209.18     | A           | Kenya                  | 20.7                                      | >50        | 39.9         | >50                                       | >50        | >50        |
| MB201.A1       | A           | Kenya                  | >50                                       | >50        | 19.5         | >50                                       | >50        | >50        |
| MB539.2B7      | A           | Kenya                  | >50                                       | >50        | >50          | >50                                       | >50        | >50        |
| MI369.A5       | A           | Kenya                  | >50                                       | >50        | >50          | >50                                       | >50        | >50        |
| MS208.A1       | A           | Kenya                  | >50                                       | >50        | >50          | >50                                       | >50        | >50        |
| Q168.a2        | A           | Kenya                  | 3.1                                       | 49.0       | >50          | >50                                       | >50        | >50        |
| Q23.17         | A           | Kenya                  | 0.041                                     | 1.7        | 0.052        | 0.199                                     | 12.2       | 0.318      |
| Q259.17        | A           | Kenya                  | 0.021                                     | 0.155      | 0.019        | 0.073                                     | 0.540      | 0.069      |
| Q461.e2        | A           | Kenya                  | >50                                       | >50        | >50          | >50                                       | >50        | >50        |
| Q769.h5        | A           | Kenya                  | 0.025                                     | 0.223      | 0.015        | 0.092                                     | 1.0        | 0.076      |
| Q842.d12       | A           | Kenya                  | >50                                       | >50        | >50          | >50                                       | >50        | >50        |
| QH209.14M.A2   | A           | Kenya                  | >50                                       | >50        | 40.5         | >50                                       | >50        | >50        |
| RW020.2        | A           | Rwanda                 | >50                                       | 0.515      | 1.5          | >50                                       | 19.3       | 29.0       |
| UG037.8        | A           | Uganda                 | >50                                       | >50        | >50          | >50                                       | >50        | >50        |
| <b>Breadth</b> | <b>N=27</b> | <b>Titer &lt; 50</b>   | <b>56%</b>                                | <b>37%</b> | <b>56%</b>   | <b>41%</b>                                | <b>30%</b> | <b>41%</b> |
|                |             | <b>Titer &lt; 1</b>    | <b>37%</b>                                | <b>15%</b> | <b>26%</b>   | <b>19%</b>                                | <b>4%</b>  | <b>19%</b> |
| <b>Potency</b> |             | <b>GMT<sup>#</sup></b> | <b>0.510</b>                              | <b>1.7</b> | <b>0.899</b> | <b>0.775</b>                              | <b>6.2</b> | <b>1.7</b> |

\*Values < 1 µg/ml are highlighted in red, and values 1 – 50 µg/ml are in green.

<sup>^</sup>VRC03 was published previously (1). However, the data used in this paper are from a completely independent experimental run, and are consistent with those generated from the previous study.

<sup>#</sup>Geometric mean titers (GMT) were calculated for neutralization sensitive viruses with an IC<sub>50</sub> or IC<sub>80</sub> value < 50 µg/ml.

**Table S2: Antibody neutralization data against 38 HIV-1 clade B Env-pseudoviruses**

| Virus ID       | Clade       | Origin                 | Neutralization IC <sub>50</sub> * (µg/ml) |            |              | Neutralization IC <sub>80</sub> * (µg/ml) |            |              |
|----------------|-------------|------------------------|-------------------------------------------|------------|--------------|-------------------------------------------|------------|--------------|
|                |             |                        | VRC03 <sup>^</sup>                        | VRC06      | VRC06b       | VRC03 <sup>^</sup>                        | VRC06      | VRC06b       |
| 3988.25        | B           | USA                    | 3.9                                       | >50        | >50          | 22.7                                      | >50        | >50          |
| 5768.04        | B           | USA                    | 0.172                                     | >50        | 0.315        | 0.878                                     | >50        | 2.6          |
| 6101.10        | B           | USA                    | 0.036                                     | 1.9        | >50          | 0.114                                     | 6.4        | >50          |
| 6535.3         | B           | USA                    | 1.3                                       | 11.2       | 12.9         | 3.5                                       | >50        | 35.2         |
| 7165.18        | B           | USA                    | >50                                       | >50        | >50          | >50                                       | >50        | >50          |
| 89.6           | B           | USA                    | 0.165                                     | >50        | 0.245        | 0.541                                     | >50        | 1.2          |
| AC10.29        | B           | USA                    | >50                                       | >50        | >50          | >50                                       | >50        | >50          |
| ADA            | B           | USA                    | 0.097                                     | 0.716      | 0.083        | 0.347                                     | 3.2        | 0.366        |
| BaL.01         | B           | USA                    | >50                                       | >50        | >50          | >50                                       | >50        | >50          |
| BG1168.01      | B           | USA                    | >50                                       | >50        | 22.8         | >50                                       | >50        | >50          |
| BL01           | B           | USA                    | >50                                       | >50        | >50          | >50                                       | >50        | >50          |
| BR07           | B           | USA                    | 3.2                                       | >50        | 18.3         | 10.3                                      | >50        | >50          |
| BX08.16        | B           | USA                    | 0.089                                     | 0.385      | 0.089        | 0.269                                     | 1.0        | 0.249        |
| CAAN.A2        | B           | USA                    | 8.2                                       | >50        | 3.7          | 30.4                                      | >50        | 10.0         |
| HO86.8         | B           | Peru                   | >50                                       | >50        | >50          | >50                                       | >50        | >50          |
| HT593.1        | B           | Haiti                  | 0.185                                     | >50        | 0.061        | 0.711                                     | >50        | 0.367        |
| HXB2           | B           | USA                    | 0.045                                     | >50        | 0.462        | 0.121                                     | >50        | 1.2          |
| JR-CSF         | B           | USA                    | 0.148                                     | >50        | 3.9          | 0.718                                     | >50        | >50          |
| JR-FL          | B           | USA                    | 0.007                                     | 0.710      | 0.007        | 0.027                                     | 4.7        | 0.025        |
| MN.3           | B           | USA                    | 0.024                                     | >50        | 0.072        | 0.059                                     | >50        | 0.548        |
| PVO.04         | B           | Italy                  | 0.713                                     | >50        | 0.093        | 2.1                                       | >50        | 0.341        |
| QH0515.01      | B           | Trinidad               | 0.120                                     | >50        | 0.222        | 0.573                                     | >50        | 4.3          |
| QH0692.42      | B           | Trinidad               | 0.471                                     | 9.1        | 0.222        | 0.921                                     | >50        | 1.2          |
| REJO.67        | B           | USA                    | 0.036                                     | 1.3        | 0.218        | 0.084                                     | >50        | 1.2          |
| RHPA.7         | B           | USA                    | 12.1                                      | 34.3       | 0.037        | >50                                       | >50        | 0.210        |
| SC422.8        | B           | Trinidad               | 0.023                                     | 3.1        | 0.048        | 0.064                                     | 9.1        | 0.088        |
| SF162          | B           | USA                    | 0.023                                     | 0.152      | 0.094        | 0.058                                     | 0.632      | 0.280        |
| SS1196.01      | B           | USA                    | 0.023                                     | 0.210      | 0.023        | 0.046                                     | 0.527      | 0.048        |
| THRO.18        | B           | USA                    | >50                                       | >50        | >50          | >50                                       | >50        | >50          |
| TRJO.58        | B           | USA                    | 0.040                                     | 0.247      | 0.023        | 0.127                                     | 0.772      | 0.149        |
| TRO.11         | B           | Italy                  | 0.271                                     | >50        | 3.8          | 1.6                                       | >50        | 49.3         |
| WITO.33        | B           | USA                    | >50                                       | >50        | >50          | >50                                       | >50        | >50          |
| YU2            | B           | USA                    | 0.049                                     | 0.135      | 0.031        | 0.140                                     | 0.470      | 0.086        |
| CNE10          | B'          | China                  | 0.515                                     | 20.7       | 0.814        | 1.6                                       | >50        | 3.6          |
| CNE12          | B'          | China                  | 0.175                                     | >50        | >50          | 0.489                                     | >50        | >50          |
| CNE14          | B'          | China                  | 0.322                                     | >50        | 2.0          | 1.4                                       | >50        | 15.0         |
| CNE4           | B'          | China                  | 0.450                                     | 3.4        | 0.493        | 1.4                                       | 11.2       | 1.7          |
| CNE57          | B'          | China                  | 0.040                                     | >50        | 0.174        | 0.275                                     | >50        | 0.546        |
| <b>Breadth</b> | <b>N=38</b> | <b>Titer &lt; 50</b>   | <b>79%</b>                                | <b>39%</b> | <b>74%</b>   | <b>71%</b>                                | <b>26%</b> | <b>66%</b>   |
|                |             | <b>Titer &lt; 1</b>    | <b>66%</b>                                | <b>18%</b> | <b>55%</b>   | <b>53%</b>                                | <b>11%</b> | <b>34%</b>   |
| <b>Potency</b> |             | <b>GMT<sup>#</sup></b> | <b>0.173</b>                              | <b>1.5</b> | <b>0.290</b> | <b>0.504</b>                              | <b>2.0</b> | <b>0.831</b> |

\*Values < 1 µg/ml are highlighted in red, and values 1 – 50 µg/ml are in green.

<sup>^</sup>VRC03 was published previously (1). However, the data used in this paper are from a completely independent experimental run, and are consistent with those generated from the previous study.

<sup>#</sup>Geometric mean titers (GMT) were calculated for neutralization sensitive viruses with an IC<sub>50</sub> or IC<sub>80</sub> value < 50 µg/ml.

**Table S3: Antibody neutralization data against 54 HIV-1 clade C Env-pseudoviruses**

| Virus ID       | Clade       | Origin                 | Neutralization IC <sub>50</sub> * (µg/ml) |            |              | Neutralization IC <sub>80</sub> * (µg/ml) |            |            |
|----------------|-------------|------------------------|-------------------------------------------|------------|--------------|-------------------------------------------|------------|------------|
|                |             |                        | VRC03 <sup>^</sup>                        | VRC06      | VRC06b       | VRC03 <sup>^</sup>                        | VRC06      | VRC06b     |
| 286.36         | C           | Ethiopia               | 12.6                                      | >50        | 3.5          | >50                                       | >50        | 29.0       |
| 288.38         | C           | Ethiopia               | 0.291                                     | >50        | 0.130        | 1.6                                       | >50        | 0.507      |
| 0013095-2.11   | C           | India                  | 0.849                                     | 30.6       | 8.3          | 4.9                                       | >50        | >50        |
| 001428-2.42    | C           | India                  | 0.023                                     | 0.166      | 0.023        | 0.023                                     | 2.0        | 0.023      |
| 0077_V1_C16    | C           | India                  | >50                                       | >50        | >50          | >50                                       | >50        | >50        |
| 00836-2.5      | C           | India                  | 0.052                                     | 0.669      | 0.039        | 0.118                                     | >50        | 0.095      |
| 0921.v2.c14    | C           | India                  | 0.633                                     | >50        | >50          | 2.5                                       | >50        | >50        |
| 16055-2.3      | C           | India                  | 0.417                                     | >50        | 0.035        | >50                                       | >50        | 0.336      |
| 16845-2.22     | C           | India                  | >50                                       | >50        | >50          | >50                                       | >50        | >50        |
| 16936-2.21     | C           | India                  | 0.083                                     | >50        | 1.8          | 0.615                                     | >50        | >50        |
| 25710-2.43     | C           | India                  | 0.180                                     | 23.1       | 0.107        | 0.570                                     | >50        | 0.297      |
| 25711-2.4      | C           | India                  | 1.3                                       | >50        | >50          | 3.4                                       | >50        | >50        |
| 25925-2.22     | C           | India                  | 0.213                                     | >50        | 0.553        | 0.993                                     | >50        | 3.4        |
| 26191-2.48     | C           | India                  | >50                                       | >50        | 43.6         | >50                                       | >50        | >50        |
| 3168_V4_C10    | C           | India                  | 0.061                                     | 1.3        | 0.087        | 0.166                                     | 3.8        | 0.204      |
| 3637_V5_C3     | C           | India                  | >50                                       | >50        | >50          | >50                                       | >50        | >50        |
| 3873_V1_C24    | C           | India                  | >50                                       | 35.1       | >50          | >50                                       | >50        | >50        |
| 6322_V4_C1     | C           | India                  | >50                                       | >50        | >50          | >50                                       | >50        | >50        |
| 6471_V1_C16    | C           | India                  | >50                                       | >50        | >50          | >50                                       | >50        | >50        |
| 6631_V3_C10    | C           | India                  | >50                                       | >50        | >50          | >50                                       | >50        | >50        |
| 6644_V2_C33    | C           | India                  | 0.267                                     | >50        | 2.7          | 0.901                                     | >50        | 46.2       |
| 6785_V5_C14    | C           | India                  | 0.138                                     | >50        | 0.253        | 0.302                                     | >50        | 0.574      |
| 6838_V1_C35    | C           | India                  | 1.3                                       | 3.0        | 1.1          | 8.0                                       | 16.0       | 9.0        |
| 96ZM651_02     | C           | Zambia                 | >50                                       | >50        | 30.1         | >50                                       | >50        | >50        |
| BR025.9        | C           | Brazil                 | >50                                       | >50        | >50          | >50                                       | >50        | >50        |
| CAP210.E8      | C           | South Africa           | >50                                       | >50        | >50          | >50                                       | >50        | >50        |
| CAP244.D3      | C           | South Africa           | >50                                       | >50        | >50          | >50                                       | >50        | >50        |
| CAP45.G3       | C           | South Africa           | >50                                       | >50        | >50          | >50                                       | >50        | >50        |
| CNE30          | C           | China                  | >50                                       | >50        | 6.8          | >50                                       | >50        | >50        |
| CNE31          | C           | China                  | 0.629                                     | 3.3        | 0.825        | 1.5                                       | 8.5        | 2.3        |
| CNE53          | C           | China                  | >50                                       | 0.395      | 0.180        | >50                                       | 4.8        | 0.667      |
| CNE58          | C           | China                  | 16.0                                      | >50        | 0.153        | >50                                       | >50        | 2.8        |
| DU123.06       | C           | South Africa           | >50                                       | >50        | >50          | >50                                       | >50        | >50        |
| DU151.02       | C           | South Africa           | >50                                       | >50        | >50          | >50                                       | >50        | >50        |
| DU156.12       | C           | South Africa           | >50                                       | >50        | >50          | >50                                       | >50        | >50        |
| DU172.17       | C           | South Africa           | >50                                       | >50        | >50          | >50                                       | >50        | >50        |
| DU422.01       | C           | South Africa           | >50                                       | >50        | >50          | >50                                       | >50        | >50        |
| MW965.26       | C           | Malawi                 | 4.1                                       | >50        | >50          | 30.3                                      | >50        | >50        |
| SO18.18        | C           | Malawi                 | 0.154                                     | >50        | 0.069        | 0.484                                     | >50        | 0.271      |
| TV1.29         | C           | South Africa           | >50                                       | >50        | >50          | >50                                       | >50        | >50        |
| TZA125.17      | C           | Tanzania               | >50                                       | >50        | >50          | >50                                       | >50        | >50        |
| TZBD.02        | C           | Tanzania               | 2.3                                       | >50        | 0.085        | >50                                       | >50        | 1.6        |
| ZA012.29       | C           | South Africa           | 17.7                                      | >50        | >50          | >50                                       | >50        | >50        |
| ZM106.9        | C           | Zambia                 | 0.180                                     | >50        | 10.6         | 1.1                                       | >50        | >50        |
| ZM109.4        | C           | Zambia                 | >50                                       | >50        | >50          | >50                                       | >50        | >50        |
| ZM135.10a      | C           | Zambia                 | >50                                       | >50        | >50          | >50                                       | >50        | >50        |
| ZM176.66       | C           | Zambia                 | 0.029                                     | >50        | >50          | 0.147                                     | >50        | >50        |
| ZM197.7        | C           | Zambia                 | 2.3                                       | >50        | 16.5         | 11.7                                      | >50        | 31.8       |
| ZM214.15       | C           | Zambia                 | >50                                       | >50        | >50          | >50                                       | >50        | >50        |
| ZM215.8        | C           | Zambia                 | >50                                       | >50        | >50          | >50                                       | >50        | >50        |
| ZM233.6        | C           | Zambia                 | >50                                       | >50        | >50          | >50                                       | >50        | >50        |
| ZM249.1        | C           | Zambia                 | 13.3                                      | >50        | >50          | >50                                       | >50        | >50        |
| ZM53.12        | C           | Zambia                 | 28.9                                      | 7.9        | 14.1         | >50                                       | 30.8       | >50        |
| ZM55.28a       | C           | Zambia                 | >50                                       | >50        | >50          | >50                                       | >50        | >50        |
| <b>Breadth</b> | <b>N=54</b> | <b>Titer &lt; 50</b>   | <b>48%</b>                                | <b>19%</b> | <b>44%</b>   | <b>35%</b>                                | <b>11%</b> | <b>31%</b> |
|                |             | <b>Titer &lt; 1</b>    | <b>30%</b>                                | <b>6%</b>  | <b>24%</b>   | <b>19%</b>                                | <b>0%</b>  | <b>17%</b> |
| <b>Potency</b> |             | <b>GMT<sup>#</sup></b> | <b>0.652</b>                              | <b>3.2</b> | <b>0.778</b> | <b>0.992</b>                              | <b>7.3</b> | <b>1.2</b> |

\*Values < 1 µg/ml are highlighted in red, and values 1 – 50 µg/ml are in green.

<sup>^</sup>VRC03 was published previously (1). However, the data used in this paper are from a completely independent experimental run, and are consistent with those generated from the previous study.

<sup>#</sup>Geometric mean titers (GMT) were calculated for neutralization sensitive viruses with an IC<sub>50</sub> or IC<sub>80</sub> value < 50 µg/ml.

**Table S4: Antibody neutralization data against 9 HIV-1 clade D Env-pseudoviruses**

| Virus ID       | Clade      | Origin                 | Neutralization IC <sub>50</sub> * (µg/ml) |             |              | Neutralization IC <sub>80</sub> * (µg/ml) |               |              |
|----------------|------------|------------------------|-------------------------------------------|-------------|--------------|-------------------------------------------|---------------|--------------|
|                |            |                        | VRC03 <sup>^</sup>                        | VRC06       | VRC06b       | VRC03 <sup>^</sup>                        | VRC06         | VRC06b       |
| 231965.c1      | D          | Uganda                 | 39.5                                      | >50         | >50          | >50                                       | >50           | >50          |
| 247-23         | D          | Cameroon               | >50                                       | >50         | >50          | >50                                       | >50           | >50          |
| 3016.v5.c45    | D          | Tanzania               | >50                                       | >50         | >50          | >50                                       | >50           | >50          |
| 57128.vrc15    | D          | Uganda                 | >50                                       | >50         | >50          | >50                                       | >50           | >50          |
| 6405.v4.c34    | D          | Tanzania               | >50                                       | >50         | >50          | >50                                       | >50           | >50          |
| A03349M1.vrc4a | D          | Uganda                 | >50                                       | >50         | >50          | >50                                       | >50           | >50          |
| NKU3006.ec1    | D          | Kenya                  | 0.093                                     | >50         | 0.055        | 0.286                                     | >50           | 0.191        |
| UG021.16       | D          | Uganda                 | >50                                       | 36.9        | >50          | >50                                       | >50           | >50          |
| UG024.2        | D          | Uganda                 | >50                                       | >50         | >50          | >50                                       | >50           | >50          |
| <b>Breadth</b> | <b>N=9</b> | <b>Titer &lt; 50</b>   | <b>22%</b>                                | <b>11%</b>  | <b>11%</b>   | <b>11%</b>                                | <b>0%</b>     | <b>11%</b>   |
|                |            | <b>Titer &lt; 1</b>    | <b>11%</b>                                | <b>0%</b>   | <b>11%</b>   | <b>11%</b>                                | <b>0%</b>     | <b>11%</b>   |
| <b>Potency</b> |            | <b>GMT<sup>#</sup></b> | <b>1.9</b>                                | <b>36.9</b> | <b>0.055</b> | <b>0.286</b>                              | <b>&gt;50</b> | <b>0.191</b> |

\*Values < 1 µg/ml are highlighted in red, and values 1 – 50 µg/ml are in green.

<sup>^</sup>VRC03 was published previously (1). However, the data used in this paper are from a completely independent experimental run, and are consistent with those generated from the previous study.

<sup>#</sup>Geometric mean titers (GMT) were calculated for neutralization sensitive viruses with an IC<sub>50</sub> or IC<sub>80</sub> value < 50 µg/ml.



**Table S5: Antibody neutralization data against 16 HIV-1 CRF01\_AE Env-pseudoviruses**

| Virus ID       | Clade       | Origin                 | Neutralization IC <sub>50</sub> * (µg/ml) |              |              | Neutralization IC <sub>80</sub> * (µg/ml) |            |            |
|----------------|-------------|------------------------|-------------------------------------------|--------------|--------------|-------------------------------------------|------------|------------|
|                |             |                        | VRC03 <sup>^</sup>                        | VRC06        | VRC06b       | VRC03 <sup>^</sup>                        | VRC06      | VRC06b     |
| 620345.c1      | AE          | Thailand               | >50                                       | >50          | >50          | >50                                       | >50        | >50        |
| C1080.c3       | AE          | Thailand               | >50                                       | >50          | >50          | >50                                       | >50        | >50        |
| C2101.c1       | AE          | Thailand               | >50                                       | >50          | >50          | >50                                       | >50        | >50        |
| C3347.c11      | AE          | Thailand               | 0.677                                     | 0.232        | 0.064        | 10.8                                      | 1.0        | 0.930      |
| C4118.09       | AE          | Thailand               | >50                                       | >50          | >50          | >50                                       | >50        | >50        |
| CNE3           | AE          | China                  | >50                                       | >50          | >50          | >50                                       | >50        | >50        |
| CNE5           | AE          | China                  | 6.6                                       | >50          | >50          | 25.2                                      | >50        | >50        |
| CNE55          | AE          | China                  | 1.5                                       | >50          | >50          | 8.2                                       | >50        | >50        |
| CNE56          | AE          | China                  | >50                                       | >50          | >50          | >50                                       | >50        | >50        |
| CNE59          | AE          | China                  | >50                                       | >50          | >50          | >50                                       | >50        | >50        |
| M02138         | AE          | Thailand               | >50                                       | >50          | >50          | >50                                       | >50        | >50        |
| R1166.c1       | AE          | Thailand               | >50                                       | >50          | 1.3          | >50                                       | >50        | 7.2        |
| R2184.c4       | AE          | Thailand               | 0.054                                     | >50          | >50          | 0.197                                     | >50        | >50        |
| R3265.c6       | AE          | Thailand               | >50                                       | >50          | >50          | >50                                       | >50        | >50        |
| TH966.8        | AE          | Thailand               | >50                                       | >50          | >50          | >50                                       | >50        | >50        |
| TH976.17       | AE          | Thailand               | >50                                       | >50          | >50          | >50                                       | >50        | >50        |
| <b>Breadth</b> | <b>N=16</b> | <b>Titer &lt; 50</b>   | <b>25%</b>                                | <b>6%</b>    | <b>13%</b>   | <b>25%</b>                                | <b>6%</b>  | <b>13%</b> |
|                |             | <b>Titer &lt; 1</b>    | <b>13%</b>                                | <b>6%</b>    | <b>6%</b>    | <b>6%</b>                                 | <b>0%</b>  | <b>6%</b>  |
| <b>Potency</b> |             | <b>GMT<sup>#</sup></b> | <b>0.774</b>                              | <b>0.232</b> | <b>0.291</b> | <b>4.6</b>                                | <b>1.0</b> | <b>2.6</b> |

\*Values < 1 µg/ml are highlighted in red, and values 1 – 50 µg/ml are in green.

<sup>^</sup>VRC03 was published previously (1). However, the data used in this paper are from a completely independent experimental run, and are consistent with those generated from the previous study.

<sup>#</sup>Geometric mean titers (GMT) were calculated for neutralization sensitive viruses with an IC<sub>50</sub> or IC<sub>80</sub> value < 50 µg/ml.

**Table S6: Antibody neutralization against 16 CRF02\_AG Env-pseudoviruses**

| Virus ID       | Clade       | Origin                 | Neutralization IC <sub>50</sub> * (µg/ml) |              |              | Neutralization IC <sub>80</sub> * (µg/ml) |            |              |
|----------------|-------------|------------------------|-------------------------------------------|--------------|--------------|-------------------------------------------|------------|--------------|
|                |             |                        | VRC03 <sup>^</sup>                        | VRC06        | VRC06b       | VRC03 <sup>^</sup>                        | VRC06      | VRC06b       |
| 235-47         | AG          | Cameroon               | 0.659                                     | >50          | 0.073        | 10.9                                      | >50        | 0.532        |
| 242-14         | AG          | Cameroon               | >50                                       | >50          | >50          | >50                                       | >50        | >50          |
| T250-4         | AG          | Cameroon               | >50                                       | >50          | >50          | >50                                       | >50        | >50          |
| T251-18        | AG          | Cameroon               | >50                                       | >50          | >50          | >50                                       | >50        | >50          |
| T255-34        | AG          | Cameroon               | >50                                       | >50          | >50          | >50                                       | >50        | >50          |
| T257-31        | AG          | Cameroon               | >50                                       | >50          | >50          | >50                                       | >50        | >50          |
| 263-8          | AG          | Cameroon               | 0.044                                     | 0.511        | 0.023        | 0.258                                     | 1.5        | 0.176        |
| T266-60        | AG          | Cameroon               | >50                                       | >50          | >50          | >50                                       | >50        | >50          |
| 269-12         | AG          | Cameroon               | >50                                       | >50          | 2.6          | >50                                       | >50        | 5.6          |
| 271-11         | AG          | Cameroon               | >50                                       | >50          | >50          | >50                                       | >50        | >50          |
| T278-50        | AG          | Cameroon               | >50                                       | >50          | >50          | >50                                       | >50        | >50          |
| T280-5         | AG          | Cameroon               | 0.035                                     | 0.783        | 0.023        | 0.310                                     | 8.7        | 0.097        |
| 928-28         | AG          | Cote d'Ivoire          | >50                                       | >50          | >50          | >50                                       | >50        | >50          |
| DJ263.8        | AG          | Kenya                  | >50                                       | >50          | >50          | >50                                       | >50        | >50          |
| T253-11        | AG          | Cameroon               | >50                                       | >50          | >50          | >50                                       | >50        | >50          |
| T33-7          | AG          | Cameroon               | >50                                       | >50          | >50          | >50                                       | >50        | >50          |
| <b>Breadth</b> | <b>N=16</b> | <b>Titer &lt; 50</b>   | <b>19%</b>                                | <b>13%</b>   | <b>25%</b>   | <b>19%</b>                                | <b>13%</b> | <b>25%</b>   |
|                |             | <b>Titer &lt; 1</b>    | <b>19%</b>                                | <b>13%</b>   | <b>19%</b>   | <b>13%</b>                                | <b>0%</b>  | <b>19%</b>   |
| <b>Potency</b> |             | <b>GMT<sup>#</sup></b> | <b>0.100</b>                              | <b>0.633</b> | <b>0.100</b> | <b>0.955</b>                              | <b>3.6</b> | <b>0.474</b> |

\*Values < 1 µg/ml are highlighted in red, and values 1 – 50 µg/ml are in green.

<sup>^</sup>VRC03 was published previously (1). However, the data used in this paper are from a completely independent experimental run, and are consistent with those generated from the previous study.

<sup>#</sup>Geometric mean titers (GMT) were calculated for neutralization sensitive viruses with an IC<sub>50</sub> or IC<sub>80</sub> value < 50 µg/ml.

**Table S7: Antibody neutralization against 17 HIV-1 recombinant and 1 clade G Env-pseudoviruses**

| Virus ID       | Clade       | Origin                 | Neutralization IC <sub>50</sub> * (µg/ml) |              |              | Neutralization IC <sub>80</sub> * (µg/ml) |            |            |
|----------------|-------------|------------------------|-------------------------------------------|--------------|--------------|-------------------------------------------|------------|------------|
|                |             |                        | VRC03 <sup>^</sup>                        | VRC06        | VRC06b       | VRC03 <sup>^</sup>                        | VRC06      | VRC06b     |
| 3301_V1_C24    | AC          | Tanzania               | 0.098                                     | >50          | >50          | 0.304                                     | >50        | >50        |
| 3589_V1_C4     | AC          | Tanzania               | >50                                       | >50          | >50          | >50                                       | >50        | >50        |
| 6540.v4.c1     | AC          | Tanzania               | >50                                       | >50          | >50          | >50                                       | >50        | >50        |
| 6545.v3.c13    | AC          | Tanzania               | >50                                       | >50          | >50          | >50                                       | >50        | >50        |
| 0815_V3_C3     | ACD         | Tanzania               | 0.043                                     | 0.305        | 0.023        | 0.075                                     | 2.4        | 0.053      |
| 6095_V1_C10    | ACD         | Tanzania               | >50                                       | >50          | >50          | >50                                       | >50        | >50        |
| 3468_V1_C12    | AD          | Tanzania               | >50                                       | >50          | >50          | >50                                       | >50        | >50        |
| CH038.12       | BC          | China                  | >50                                       | >50          | >50          | >50                                       | >50        | >50        |
| CH070.1        | BC          | China                  | >50                                       | >50          | >50          | >50                                       | >50        | >50        |
| CH117.4        | BC          | China                  | 0.117                                     | >50          | 0.617        | 0.689                                     | >50        | 16.1       |
| CH181.12       | BC          | China                  | 8.1                                       | >50          | 1.7          | >50                                       | >50        | 20.8       |
| CNE15          | BC          | China                  | 0.422                                     | >50          | >50          | 3.9                                       | >50        | >50        |
| CNE7           | BC          | China                  | 0.419                                     | >50          | 0.240        | 2.6                                       | >50        | 0.926      |
| CNE40          | BC          | China                  | 0.421                                     | >50          | 0.096        | 1.3                                       | >50        | 0.330      |
| 3326_V4_C3     | CD          | Tanzania               | >50                                       | >50          | >50          | >50                                       | >50        | >50        |
| 3337_V2_C6     | CD          | Tanzania               | >50                                       | >50          | >50          | >50                                       | >50        | >50        |
| 3817.v2.c59    | CD          | Tanzania               | >50                                       | >50          | >50          | >50                                       | >50        | >50        |
| X2088_c9       | G           | Ghana                  | >50                                       | >50          | >50          | >50                                       | >50        | >50        |
| <b>Breadth</b> | <b>N=18</b> | <b>Titer &lt; 50</b>   | <b>39%</b>                                | <b>6%</b>    | <b>28%</b>   | <b>33%</b>                                | <b>6%</b>  | <b>28%</b> |
|                |             | <b>Titer &lt; 1</b>    | <b>33%</b>                                | <b>6%</b>    | <b>22%</b>   | <b>17%</b>                                | <b>0%</b>  | <b>17%</b> |
| <b>Potency</b> |             | <b>GMT<sup>#</sup></b> | <b>0.313</b>                              | <b>0.305</b> | <b>0.224</b> | <b>0.770</b>                              | <b>2.4</b> | <b>1.4</b> |

\*Values < 1 µg/ml are highlighted in red, and values 1 – 50 µg/ml are in green.

<sup>^</sup>VRC03 was published previously (1). However, the data used in this paper is from a completely independent experimental run, which are consistent with that generated from the previous study.

<sup>#</sup>Geometric mean titers (GMT) were calculated for neutralization sensitive viruses with an IC<sub>50</sub> or IC<sub>80</sub> value < 50 µg/ml.

## Reference

1. Wu, X., Z. Y. Yang, Y. Li, C. M. Hogerkorp, W. R. Schief, M. S. Seaman, T. Zhou, S. D. Schmidt, L. Wu, L. Xu, N. S. Longo, K. McKee, S. O'Dell, M. K. Louder, D. L. Wycuff, Y. Feng, M. Nason, N. Doria-Rose, M. Connors, P. D. Kwong, M. Roederer, R. T. Wyatt, G. J. Nabel, and J. R. Mascola. 2010. Rational design of envelope identifies broadly neutralizing human monoclonal antibodies to HIV-1. *Science* **329**:856-861.
2. Wu, X., T. Zhou, J. Zhu, B. Zhang, I. Georgiev, C. Wang, X. Chen, N. S. Longo, M. Louder, K. McKee, S. O'Dell, S. Perfitto, S. D. Schmidt, W. Shi, L. Wu, Y. Yang, Z. Y. Yang, Z. Yang, Z. Zhang, M. Bonsignori, J. A. Crump, S. H. Kapiga, N. E. Sam, B. F. Haynes, M. Simek, D. R. Burton, W. C. Koff, N. A. Doria-Rose, M. Connors, J. C. Mullikin, G. J. Nabel, M. Roederer, L. Shapiro, P. D. Kwong, and J. R. Mascola.

2011. Focused evolution of HIV-1 neutralizing antibodies revealed by structures and deep sequencing. *Science* **333**:1593-1602.
3. **Zhou, T., I. Georgiev, X. Wu, Z. Y. Yang, K. Dai, A. Finzi, Y. D. Kwon, J. F. Scheid, W. Shi, L. Xu, Y. Yang, J. Zhu, M. C. Nussenzweig, J. Sodroski, L. Shapiro, G. J. Nabel, J. R. Mascola, and P. D. Kwong.** 2010. Structural basis for broad and potent neutralization of HIV-1 by antibody VRC01. *Science* **329**:811-817.
